# Supplementary material
Source: PubMed Central journal article supplement (PMC2711352)
Supplement: mmc1.pdf [file mmc1.pdf]

Biophysical Journal, Volume 97

**Supporting Material**

**The Length and Viscosity Dependence of End-to-end Collision Rates in Single-stranded DNA**

Takanori Uzawa, Ryan R. Cheng, Kevin J Cash, Dmitrii E. Makarov, and Kevin W Plaxco

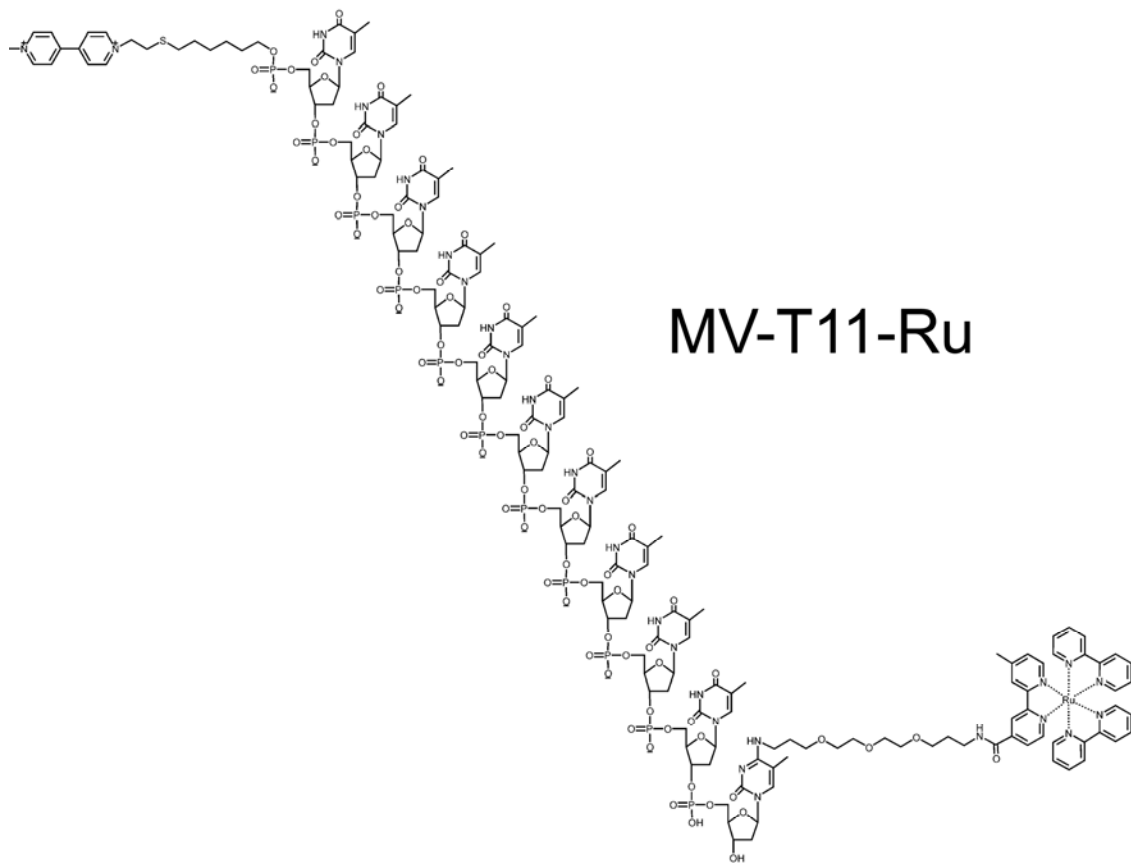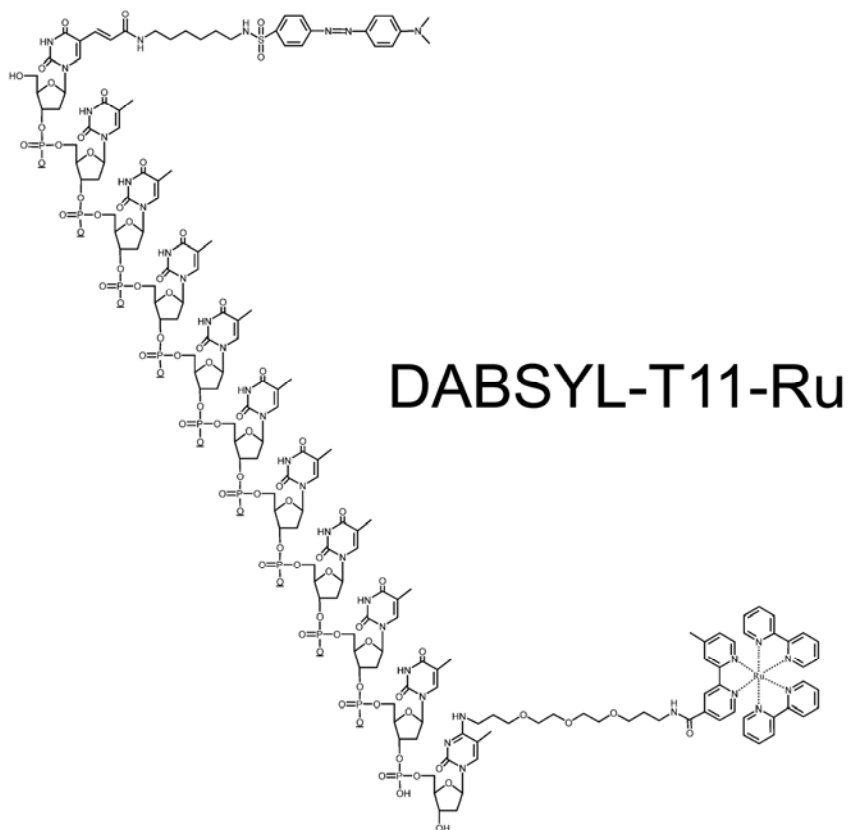

Fig. S1. The structure of the MV-T11-Ru (top) and DABSYL-T11-Ru (bottom). The quencher (N-methyl-N'-ethyl bipyridine, MV or 4-Dimethylaminoazobenzene, DABSYL) is attached on the 5' terminal of an eleven thymine oligonucleotide and the derivative of ruthenium tris(bipyridine) is modified of its 3' terminal.

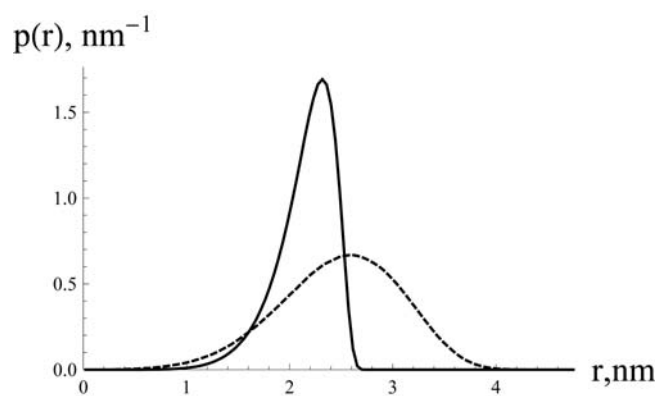

Fig. S2. The computed distribution of the end-to-end distance for a single-stranded, nine-base DNA (solid line). The dashed line was obtained when linker linkers were added to each end of the DNA chain.
